# Supplementary material for: Transition metal single atom embedded GaN monolayer surface for efficient and selective CO2 electroreduction
Source: Royal Society of Chemistry journal article supplement (doi:10.1039/d2ta06991a), 2022-01-01
Supplement: d2ta06991a1.pdf [file d2ta06991a1.pdf]

## Supplementary Information

### **Transition metal single atom embedded GaN monolayer surface for efficient and selective CO<sub>2</sub> electroreduction**

Muhammad Umer<sup>‡</sup>, Sohaib Umer<sup>‡</sup>, Rohit Anand, Jinhong Mun, Mohammad Zafari, Geunsik Lee\* and Kwang S. Kim\*

Center for Superfunctional Materials, Department of Chemistry, Ulsan National Institute of Science and Technology (UNIST), 50 UNIST-gil, Ulsan 44919, South Korea

\* Corresponding authors: \*E-mail: [gslee@unist.ac.kr](mailto:gslee@unist.ac.kr) (G.L.), [kimks@unist.ac.kr](mailto:kimks@unist.ac.kr) (K.S.K.)

‡ These authors contributed equally

### **Contents**

Supplementary Figures.....(S2)

Supplementary Tables .....(S16)

## Supplementary Figures

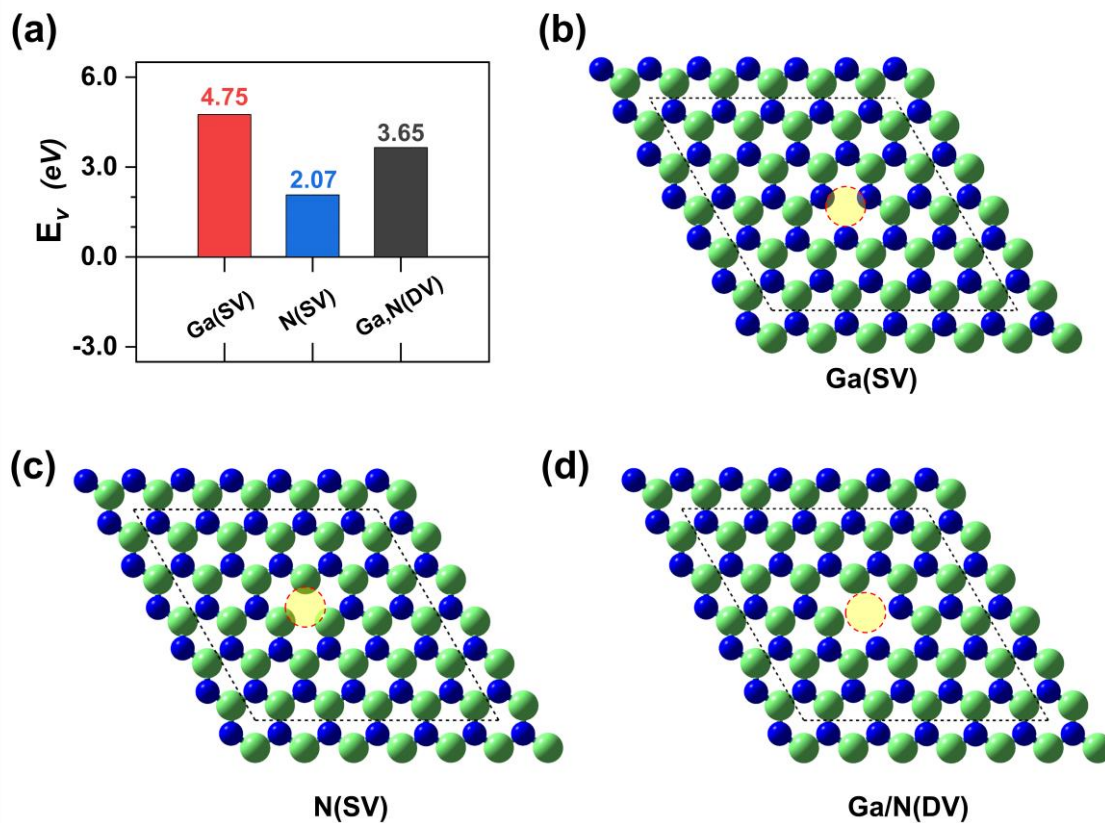

**Fig. S1.** (a) Vacancy formation energies ( $E_v = E_d + \mu_{\text{Ga/N}} - E_{\text{prist}}$ ) of (b) Ga single vacancy (Ga-SV), (c) nitrogen single vacancy (N-SV), and (d) gallium-nitrogen double vacancy (Ga/N-DV) defect sites over GaN monolayer surface (Color code: Ga, light green; N, blue). Where  $\mu_{\text{Ga/N}}$  represents the chemical potential of Ga and N respectively, calculated with respect to bulk Ga and gaseous  $\text{N}_2$ , while the  $E_{\text{prist}}$  denotes the energy of pristine surface without any surface defect.

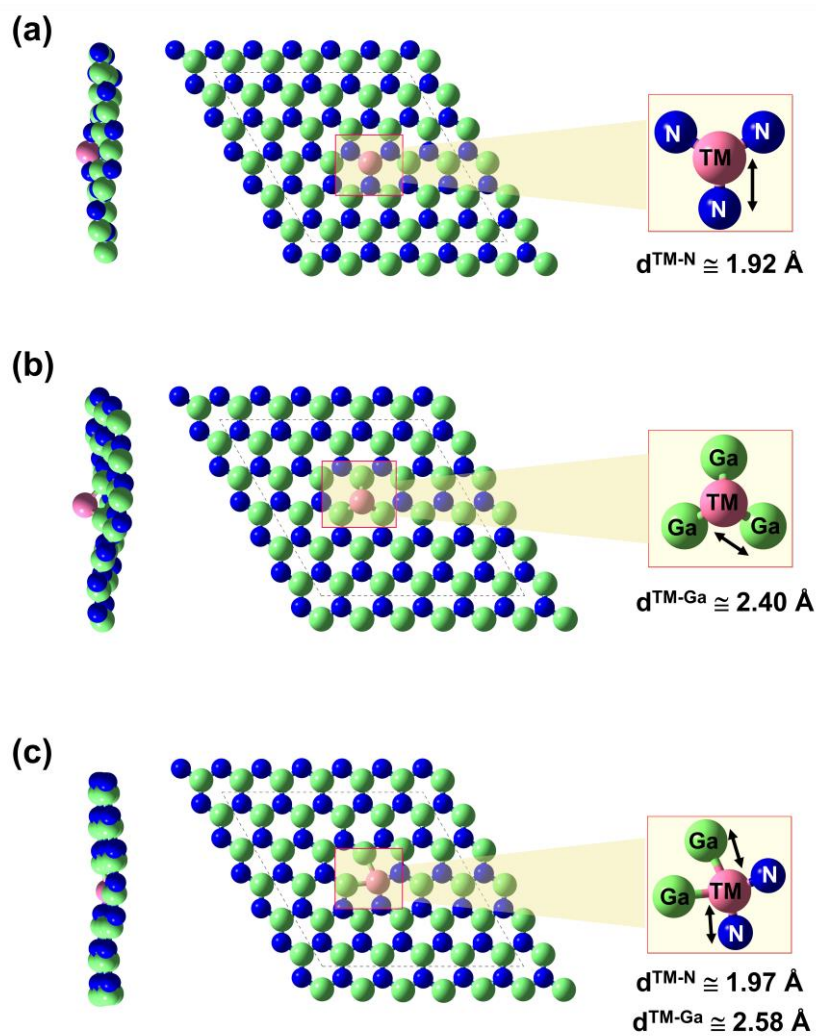

**Fig. S2.** Top and side views of (TM)SA embedded into (a) Ga-SV, (b) N-SV, and (c) Ga/N-DV defect sites. The distance from TM to nearest neighbor ( $d^{\text{TM-Ga/N}}$ ) surface coordinating atoms are highlighted for each defect site of TM-SAC. Here the case for TM atom is Os (light pink).

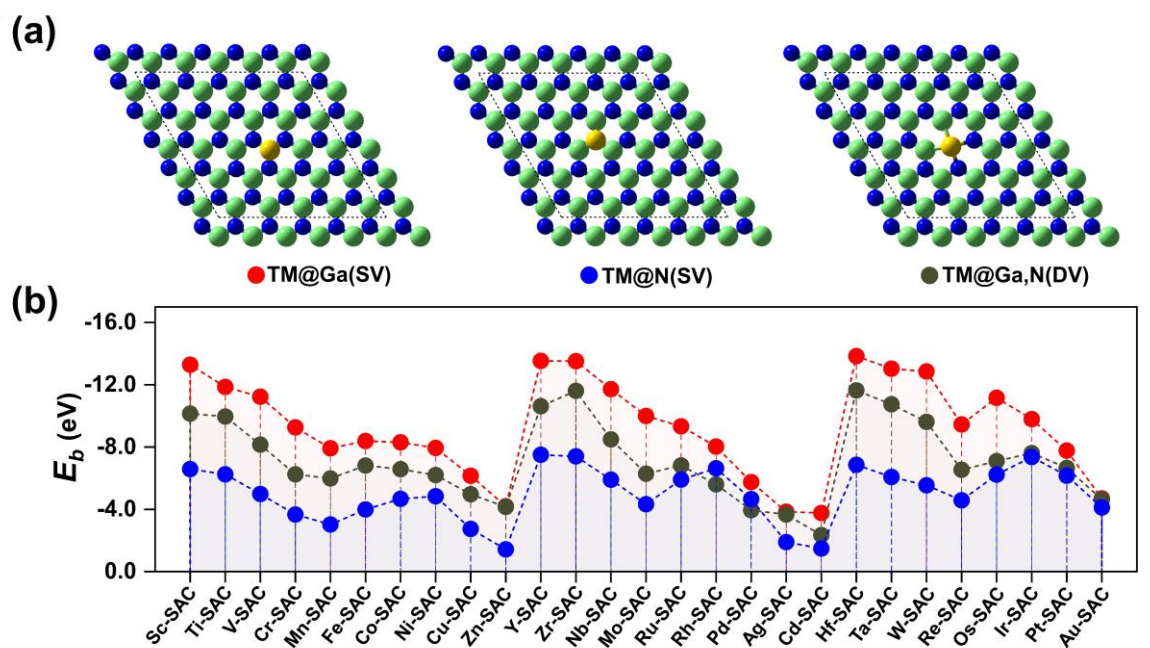

**Fig. S3.** (a) Geometric structures of (TM)SAs embedded into various defect sites including Ga-SV, N-SV, and Ga/N-DV sites. (b) TM binding energies ( $E_b$ ) for each defect type surface. The more negative  $E_b$  values indicate the stronger metal-support interactions. Among the investigated defect type surfaces, TM-SAC(Ga-SV) structures showed a superior stability. (Color code: transition metal, golden; Ga, light green; N, blue).

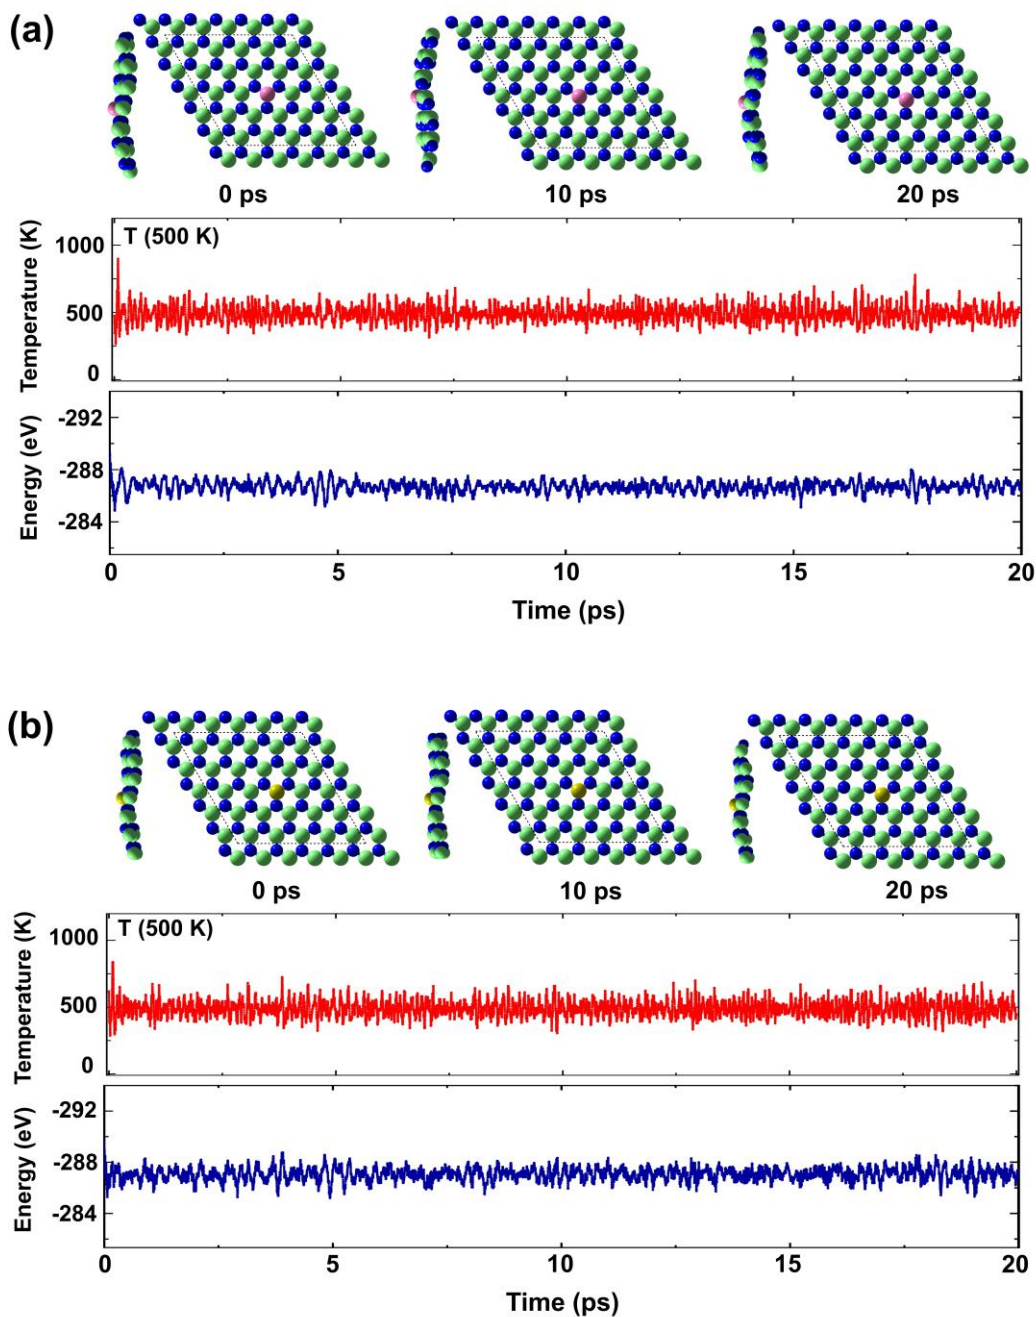

**Fig. S4.** Snapshots of the *ab initio* molecular dynamics simulation and corresponding energy and temperature profiles for (a) Os-SAC and (b) Ir-SAC, respectively. The temperature is controlled at 500 K whereas the small fluctuations in energy and temperature profile showing the representative structures are dynamically stable. (Color code: Os, light pink; Ir, golden-brown; Ga, light green; N, blue).

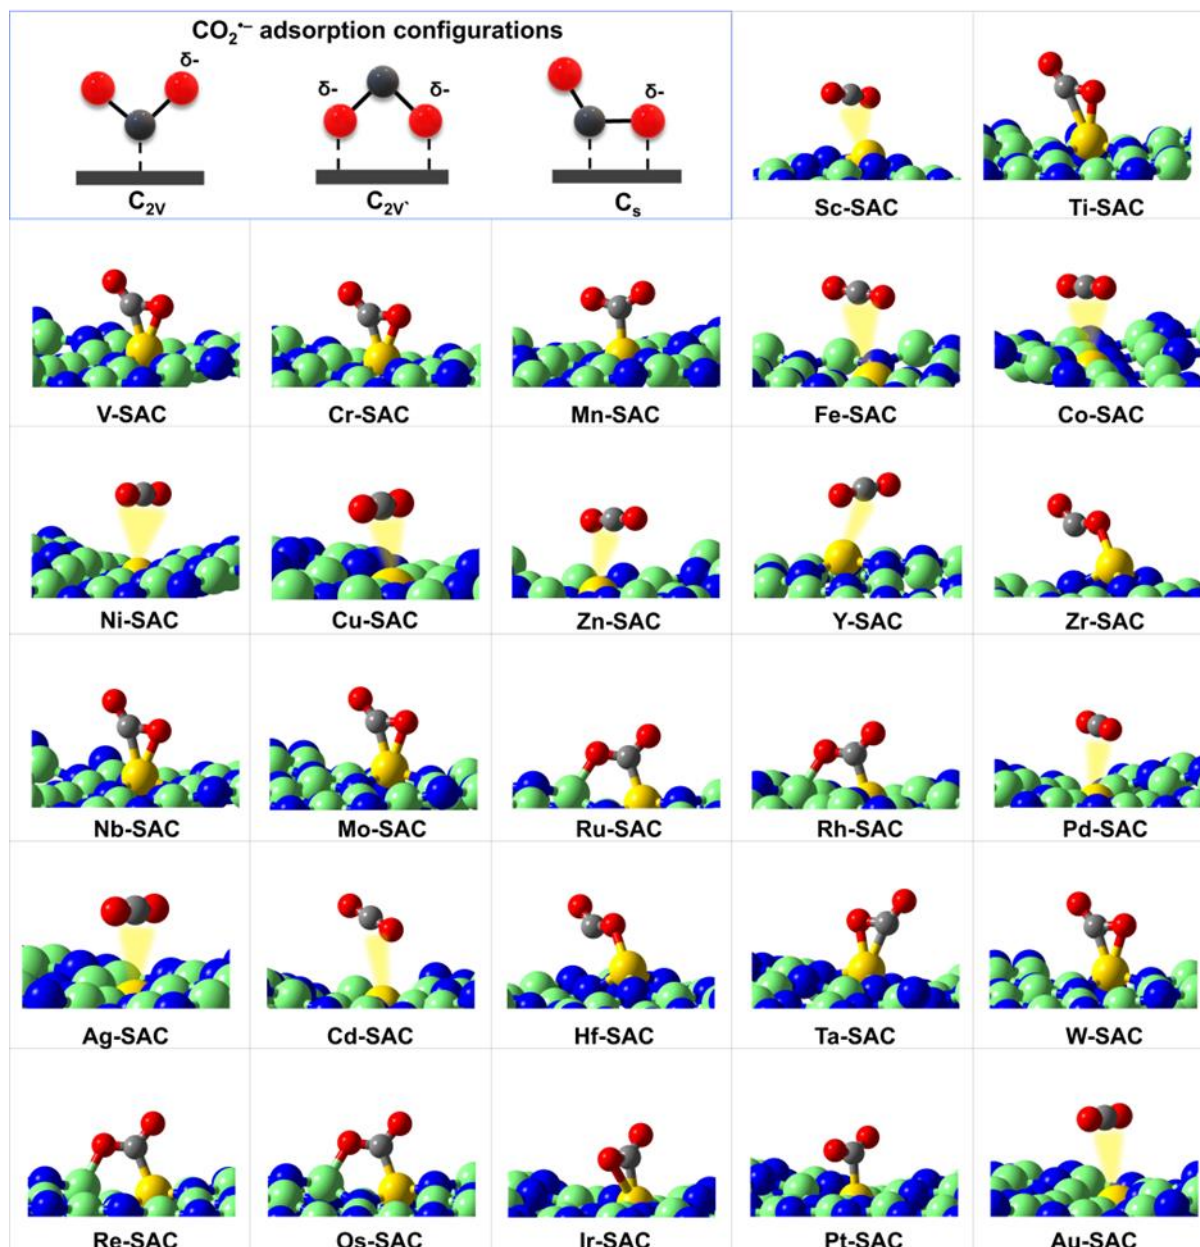

**Fig. S5.** Schematic illustration of possible CO<sub>2</sub> adsorption configurations and optimized CO<sub>2</sub> adsorbed geometries of all the considered systems. The golden filled line represents the physisorbed systems. The chemisorbed systems exhibit different types of CO<sub>2</sub> adsorption configurations either by sharing single metal active site in the mono- and bi-dentate fashion or the surface Ga atom stabilized configuration through Ga-O coordination (e.g Ru, Rh, Re and Os-SACs). (Color code: transition metal, golden; Ga, light green; N, blue; C, gray; O, red).

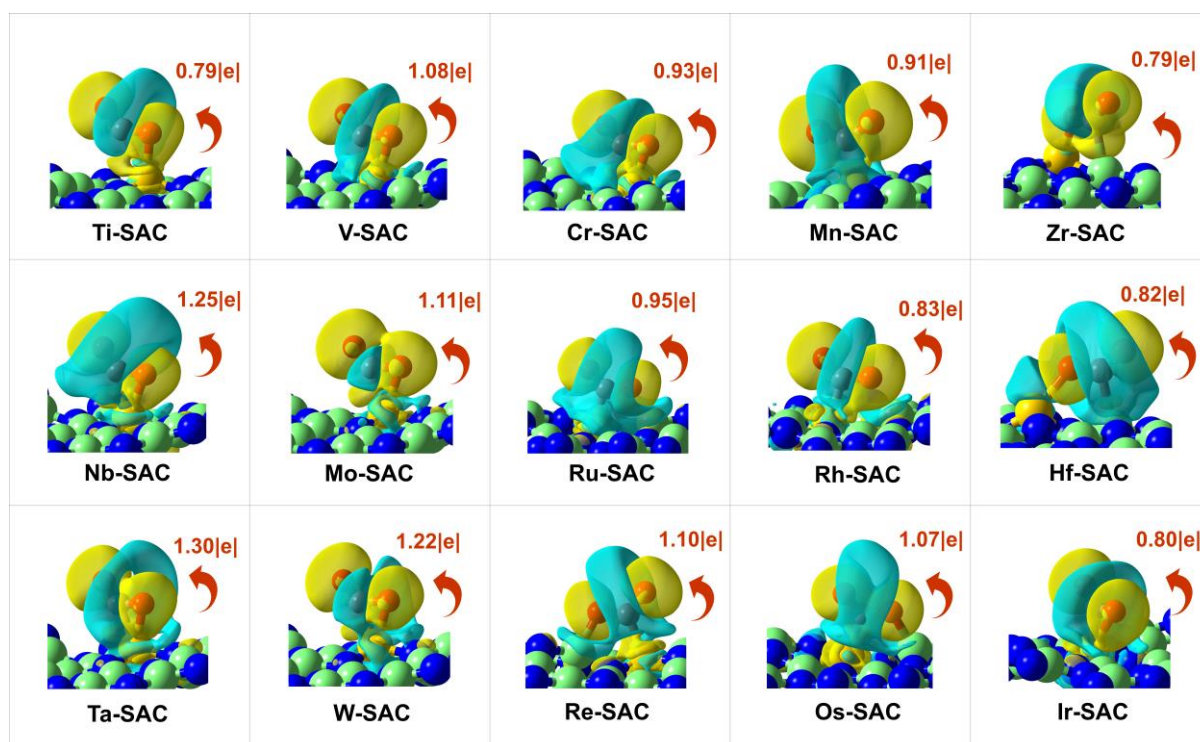

**Fig. S6.** The charge density difference plots of CO<sub>2</sub> chemisorbed over various TM-SACs showing a significant amount of charge transfer takes place from the surface to adsorbed CO<sub>2</sub> molecule. The isosurface value is 0.001563 e/Å<sup>3</sup>. The charge depletion and accumulation are represented by cyan and yellow colors, respectively. The values given in red color indicate net Bader charge on CO<sub>2</sub><sup>\*-</sup> species.

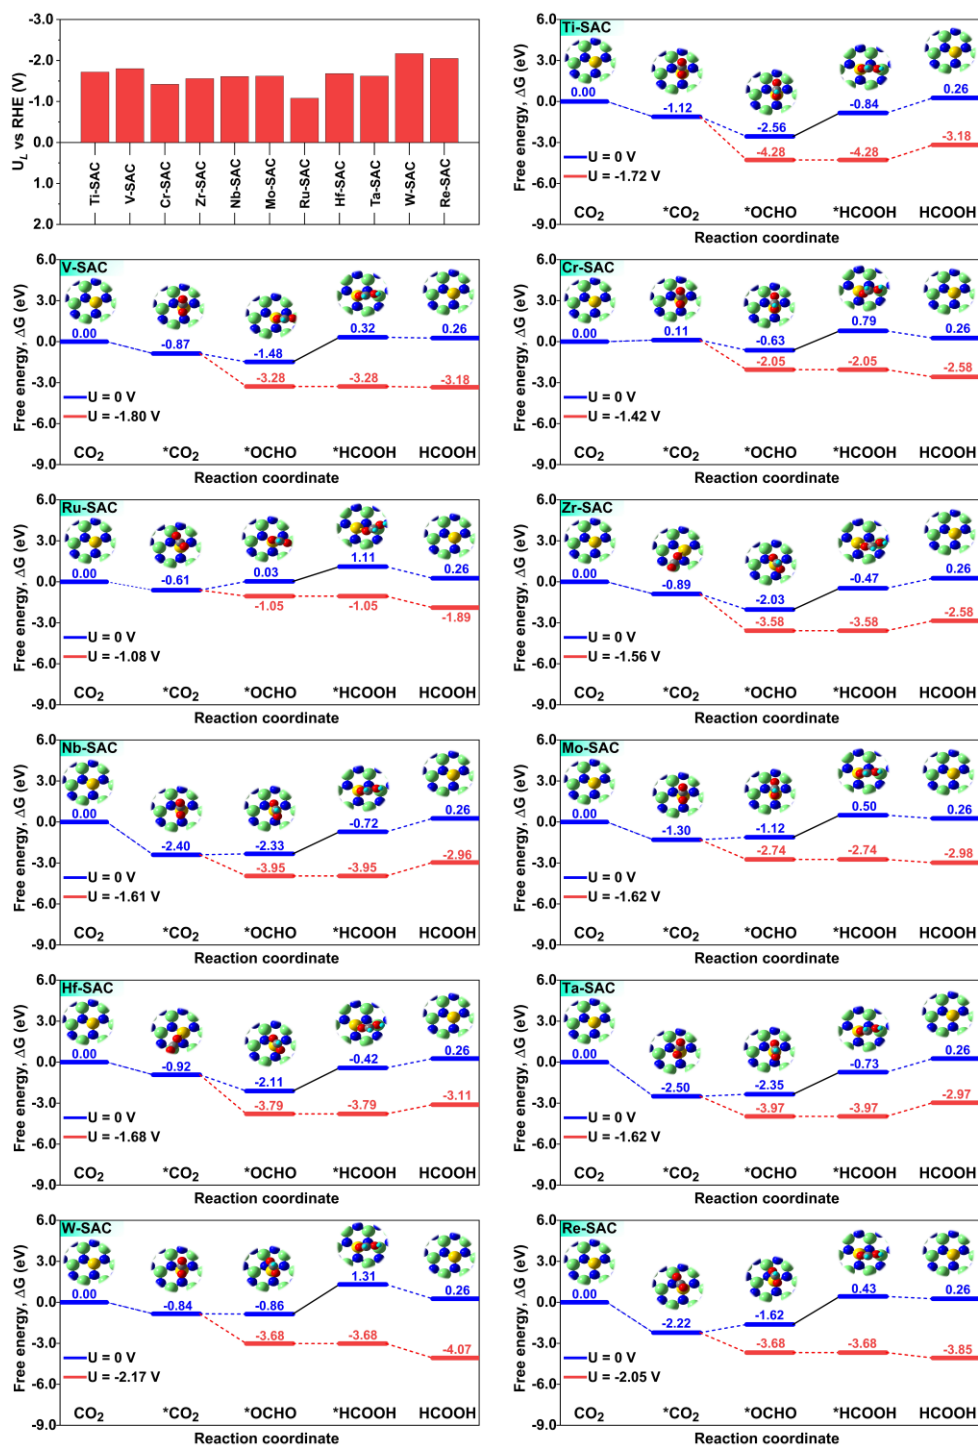

**Fig. S7.** Limiting potentials ( $U_L(s)$ ) of Ti/V/Cr/Mn/Zr/Nb/Mo/Ru/Rh/Hf/Ta/W and Re embedded SACs for HCOOH formation. Free energy profiles for  $\text{CO}_2$  reduction to HCOOH over different TM-SACs at zero and applied potential. The solid black line represents the potential-limiting step (PLS) of the catalytic pathway for HCOOH formation (Color code: transition metal, golden; Ga, light green; N, blue; C, gray; O, red; H, cyan).



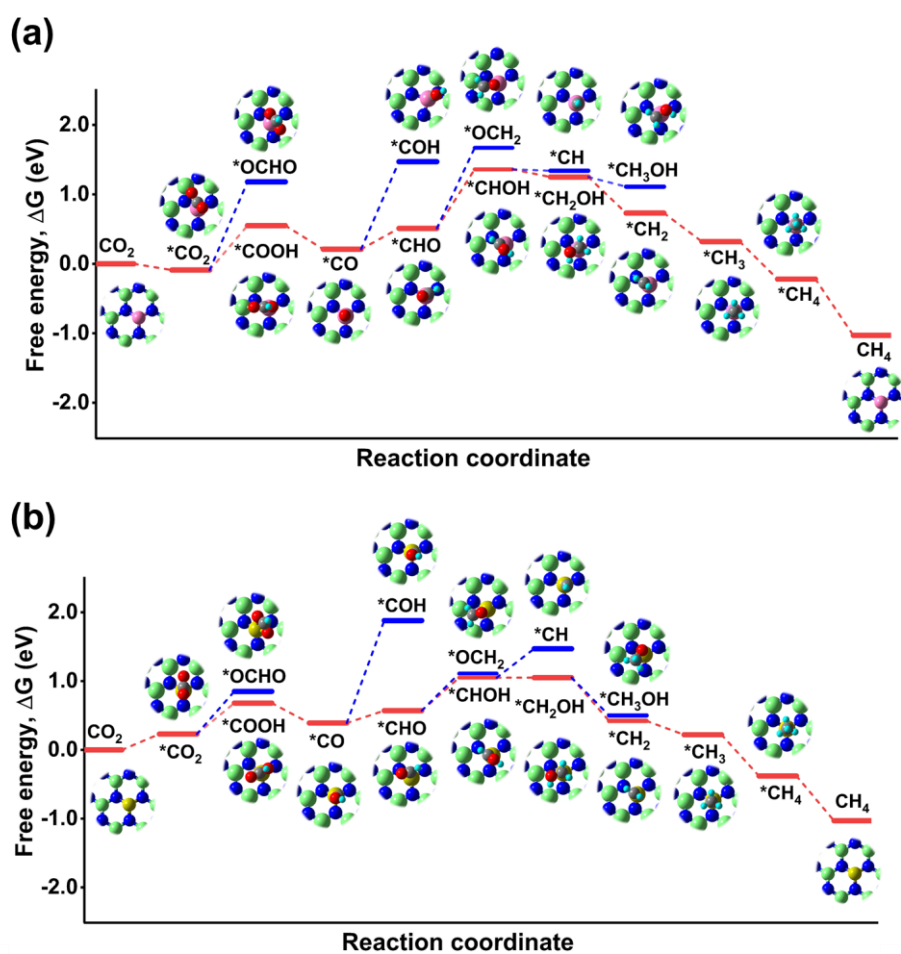

**Fig. S8.** Free energy diagrams for CO<sub>2</sub> reduction on (a) Os-SAC and (b) Ir-SAC along different pathways. The red and blue lines represent the energetically favorable and non-favorable pathways, respectively. (Color code: Os, light pink; Ir, golden-brown; Ga, light green; N, blue; C, gray; O, red; H, cyan).

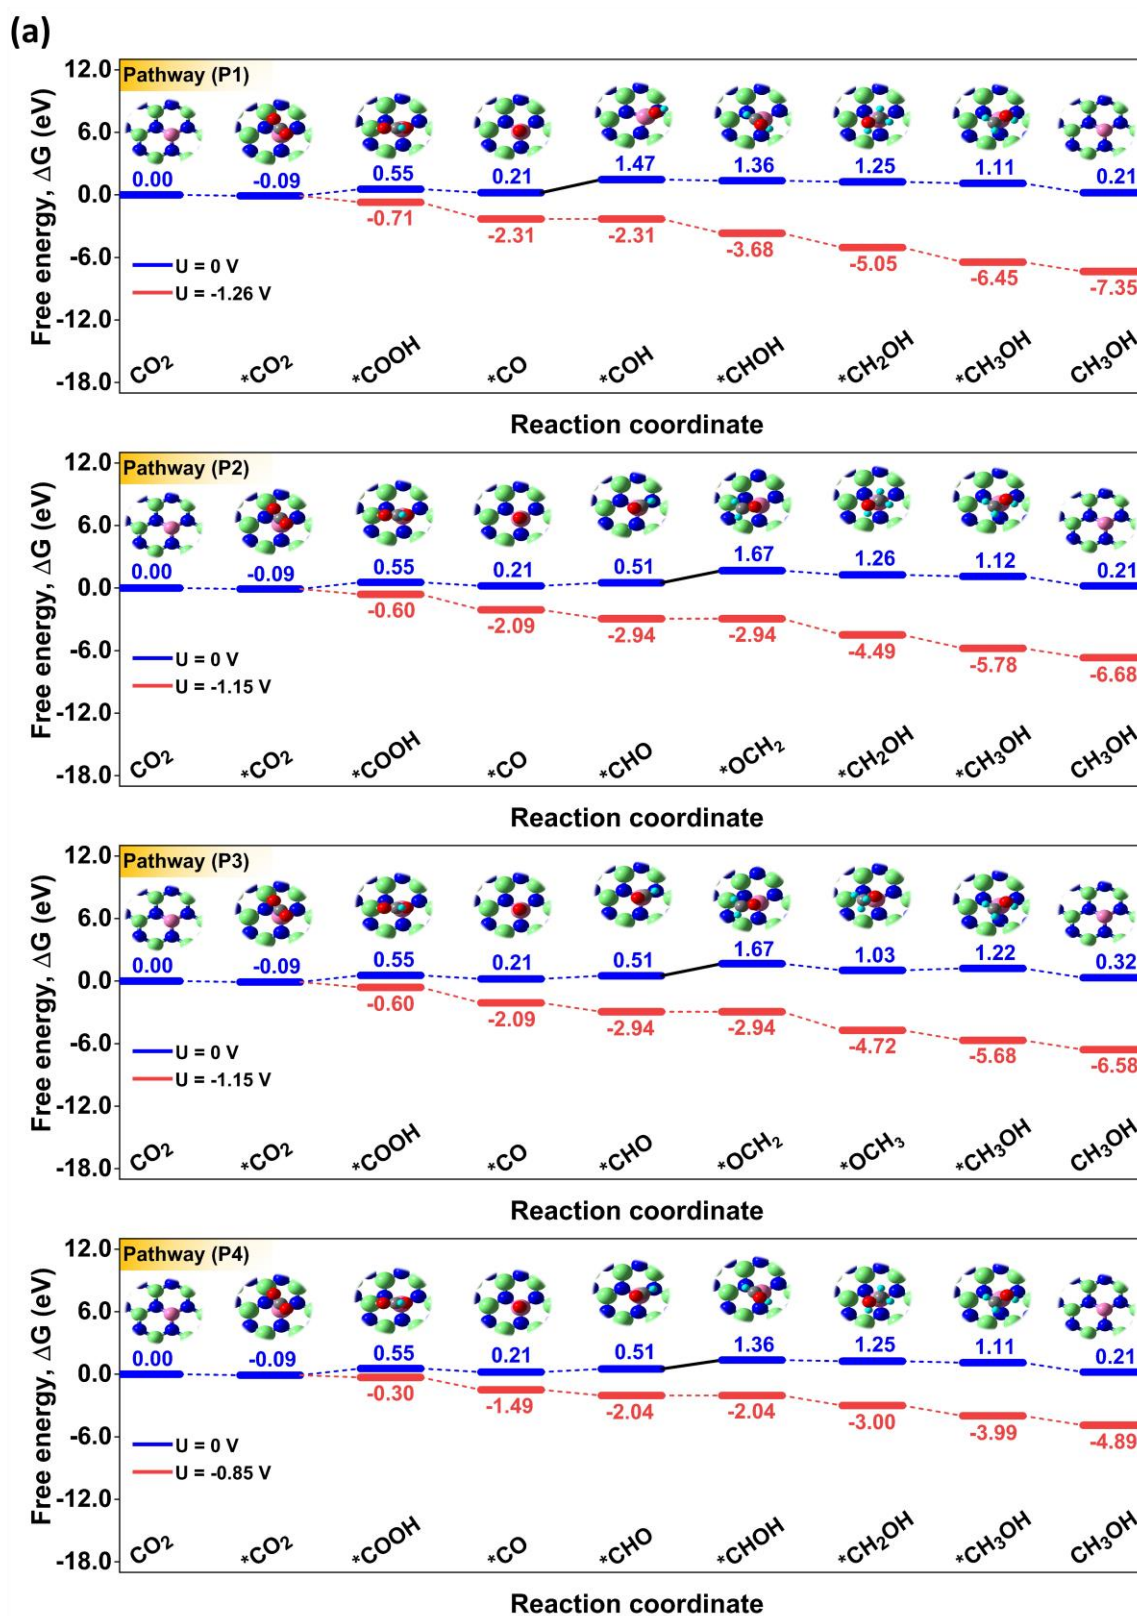

**Fig. S9.** (a) Free energy profiles of  $\text{CO}_2$  reduction to  $\text{CH}_3\text{OH}$  on Os-SAC at zero and applied potential via different reduction pathways (P1 through P4). Solid black lines indicate the potential-limiting step (PLS) of the corresponding pathway. (Color code: Os, light pink; Ga, light green; N, blue; C, gray; O, red; H, cyan).

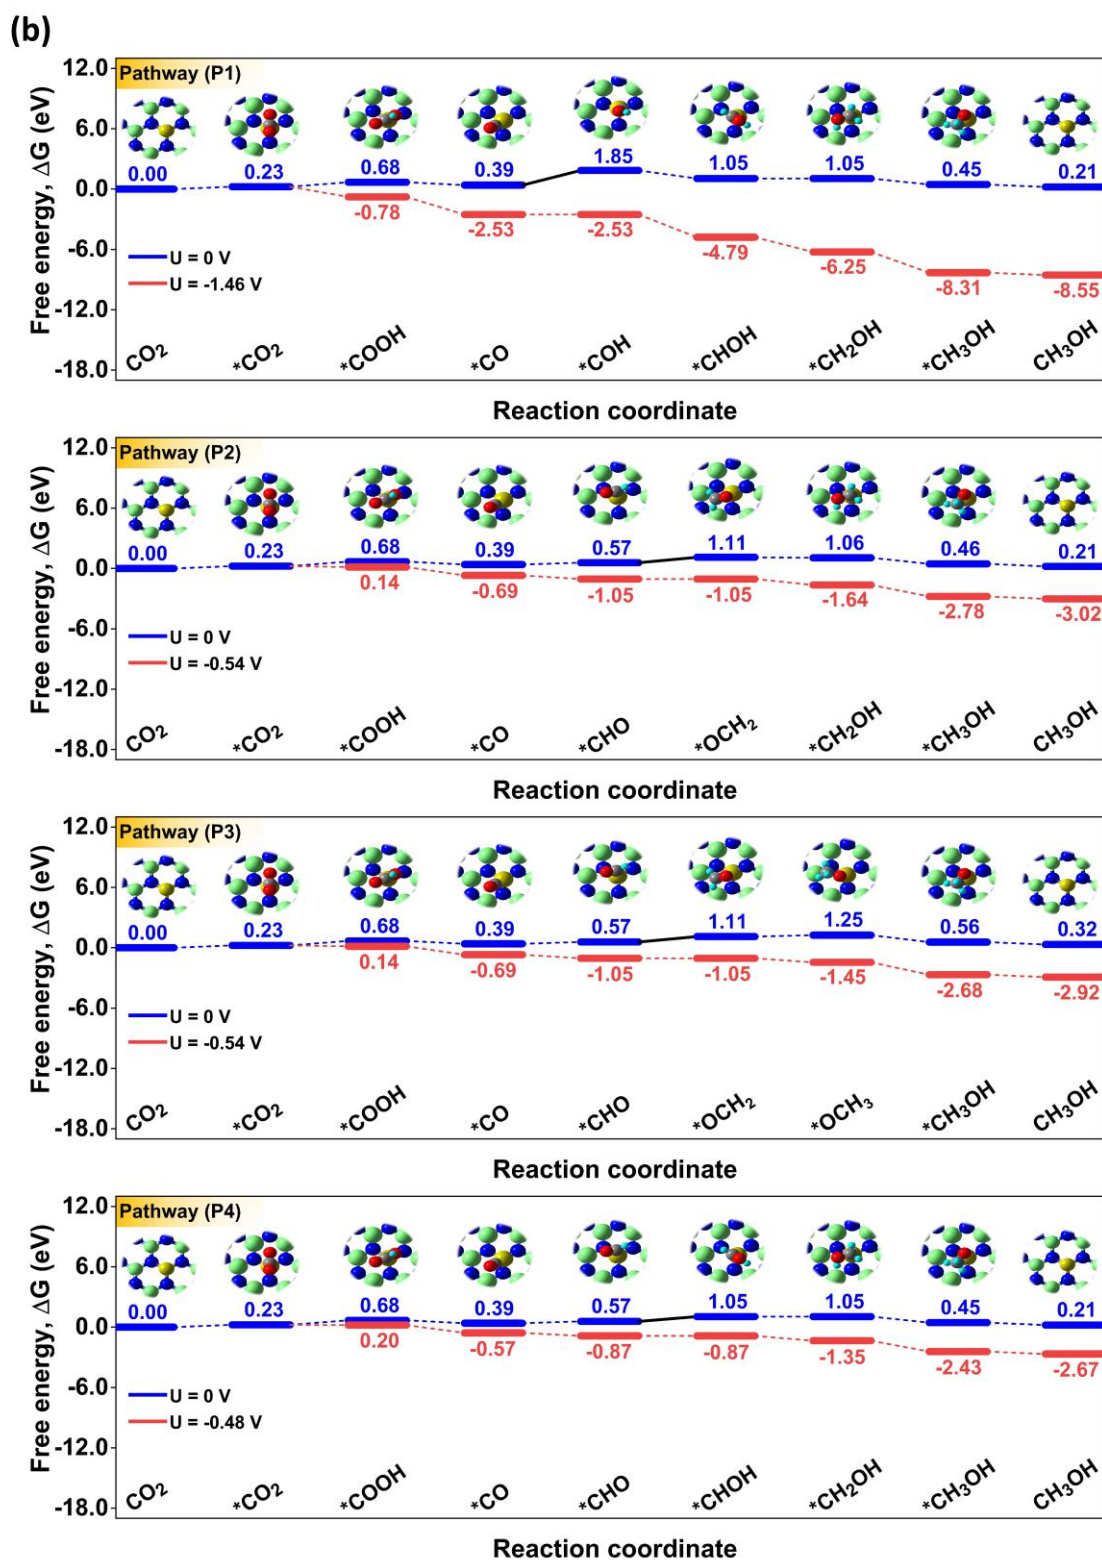

**Fig. S9.** (b) Free energy profiles of  $\text{CO}_2$  reduction to  $\text{CH}_3\text{OH}$  over Ir-SAC at zero and applied potential via different reduction pathways (P1 through P4). Solid black lines indicate the potential-limiting step (PLS) of the corresponding pathway. (Color code: Ir, golden-brown; Ga, light green; N, blue; C, gray; O, red; H, cyan).

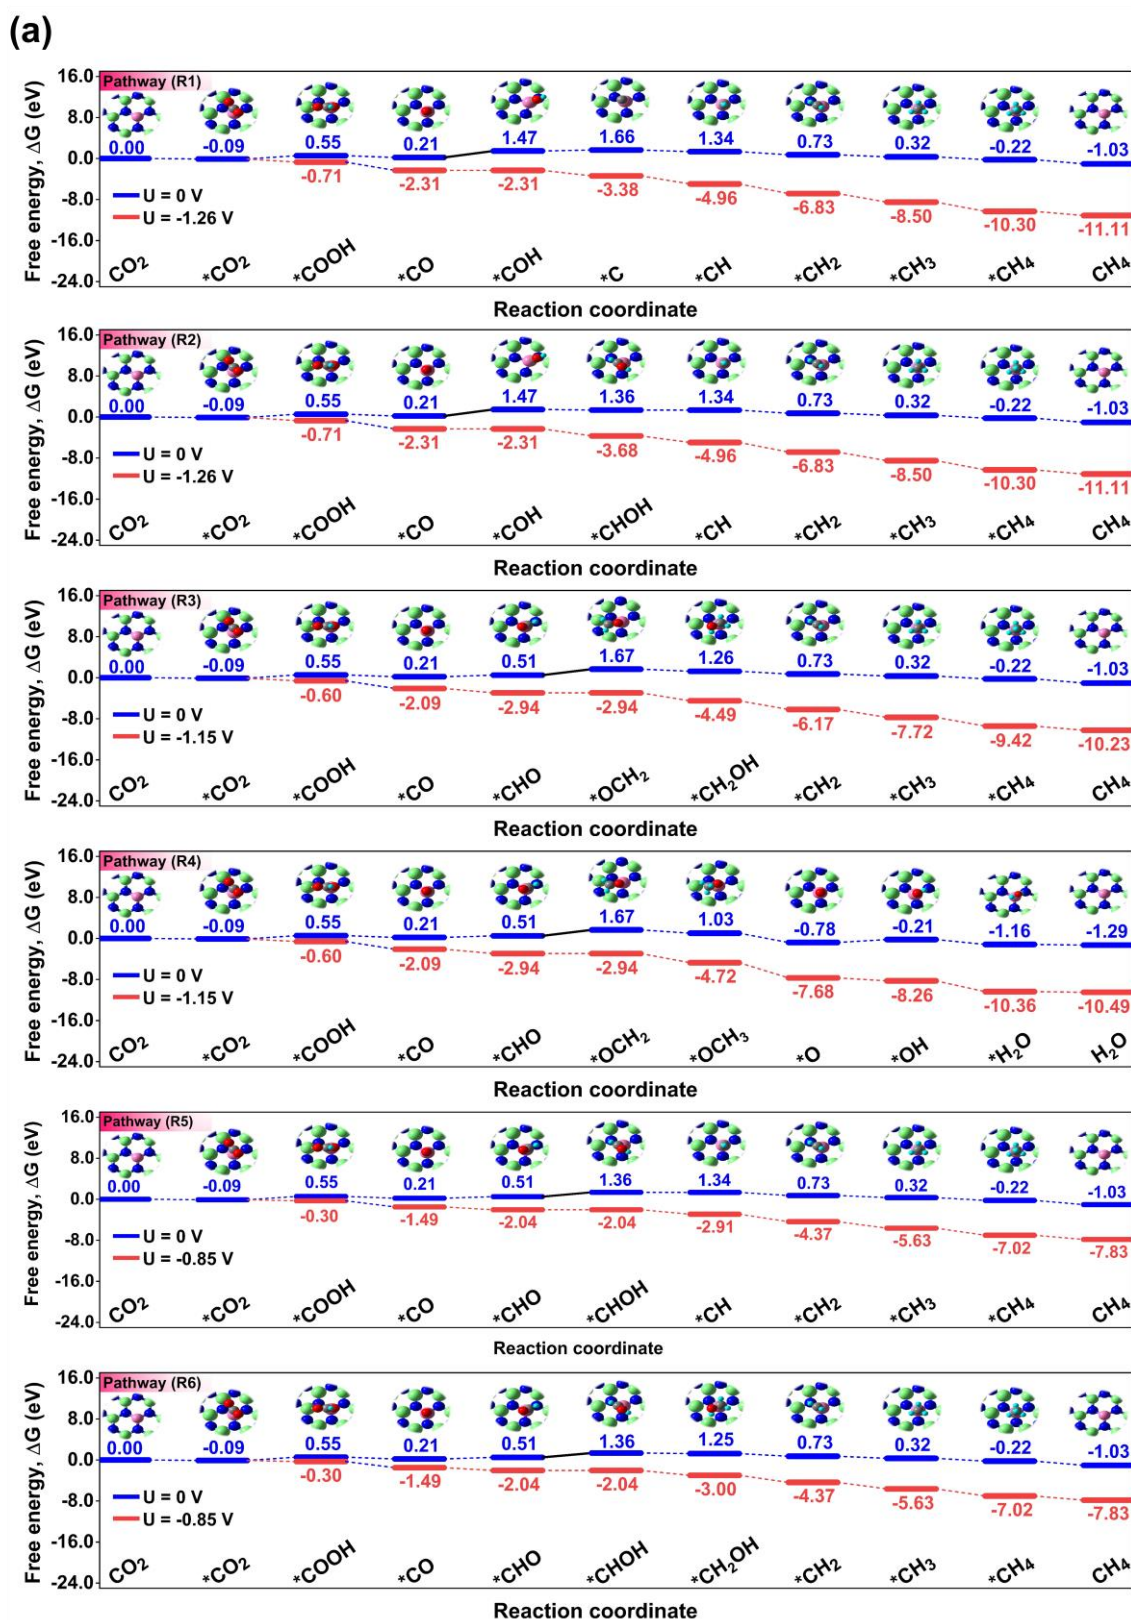

**Fig. S10.** (a) Free energy profiles of CO<sub>2</sub> reduction to CH<sub>4</sub> on Os-SAC at zero and applied potential via different reduction pathways (R1 through R6). Solid black lines indicate the potential-limiting step (PLS) of the corresponding pathway. (Color code: Os, light pink; Ga, light green; N, blue; C, gray; O, red; H, cyan).

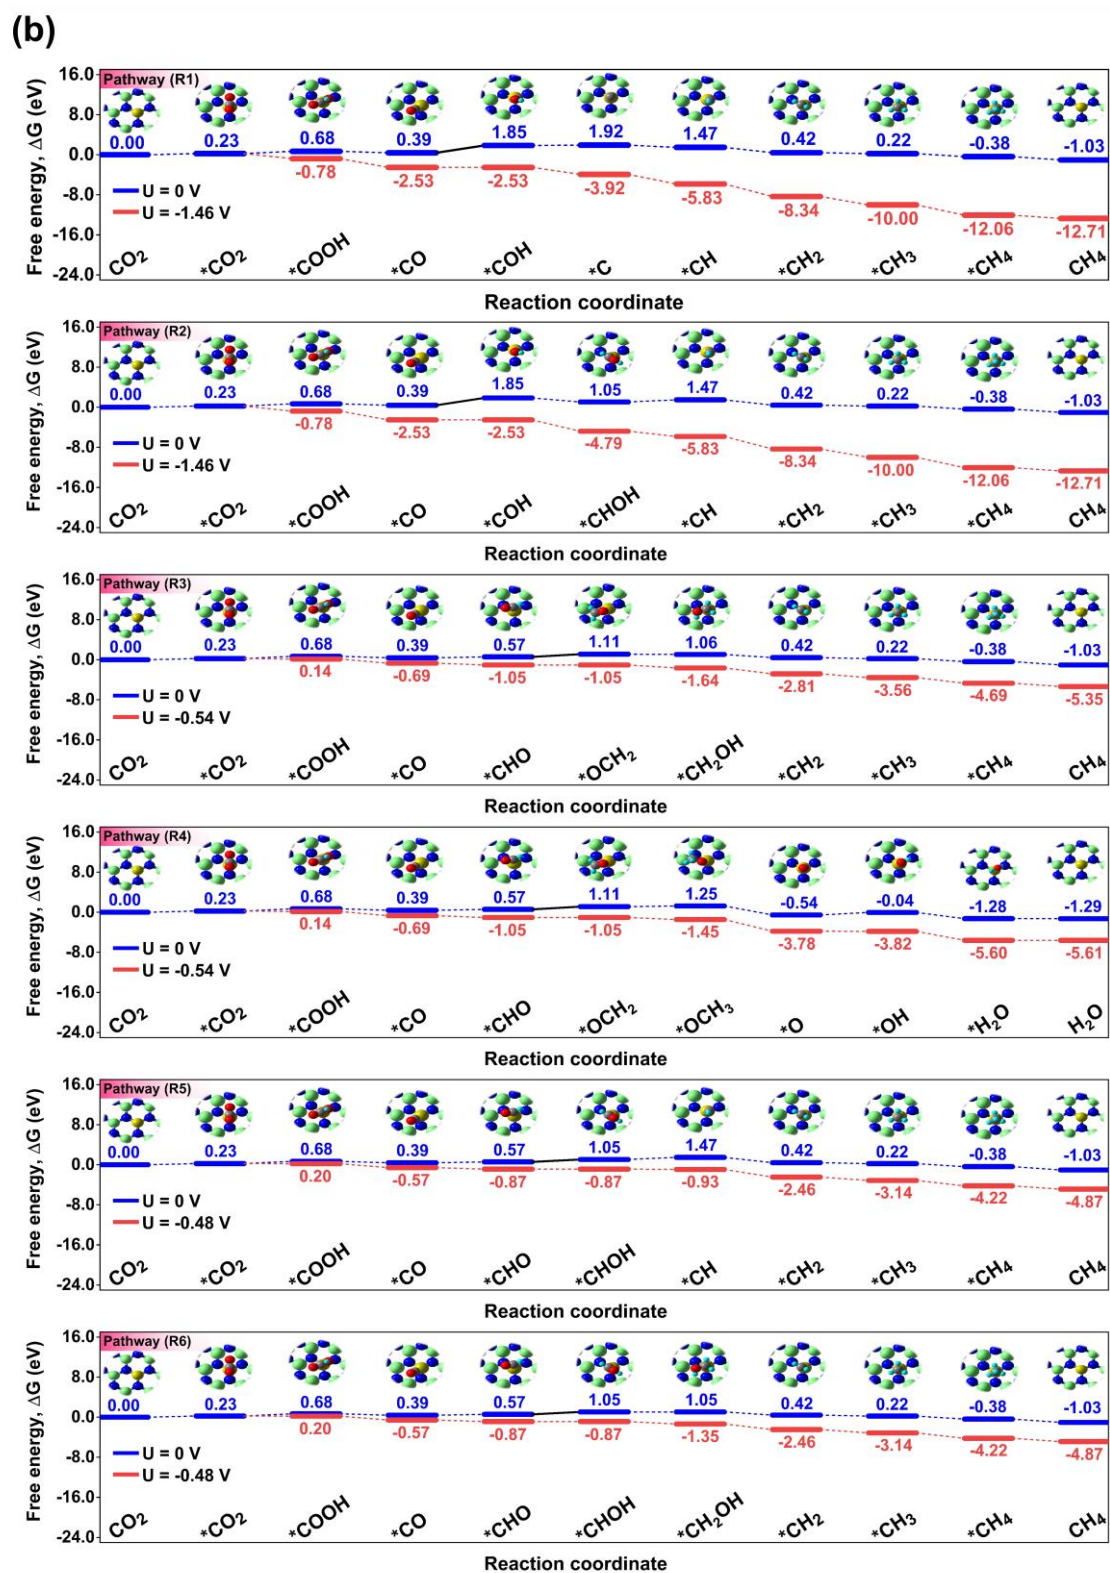

**Fig. S10.** (b) Free energy profiles of CO<sub>2</sub> reduction to CH<sub>4</sub> on Ir-SAC at zero and applied potential via different reduction pathways (R1 through R6). Solid black lines indicate the potential-limiting step (PLS) of the corresponding pathway. (Color code: Ir, golden-brown; Ga, light green; N, blue; C, gray; O, red; H, cyan).

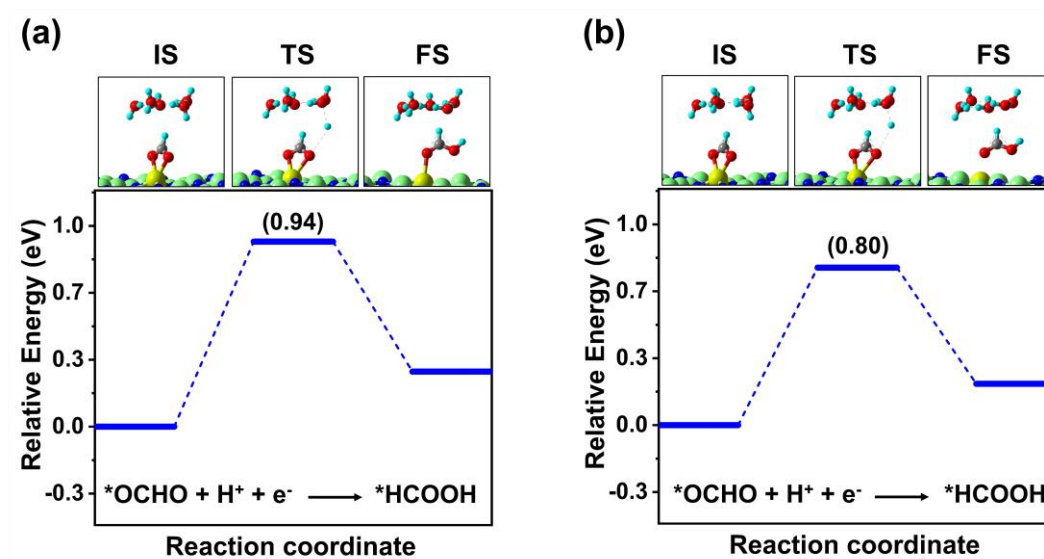

**Fig. S11.** Calculated kinetic energy barriers at the potential limiting steps for CO<sub>2</sub> reduction to HCOOH over (a) Mn- and (b) Rh-SACs. The (IS) initial state, (TS) transition state and (FS) final state are shown on top of the figure.

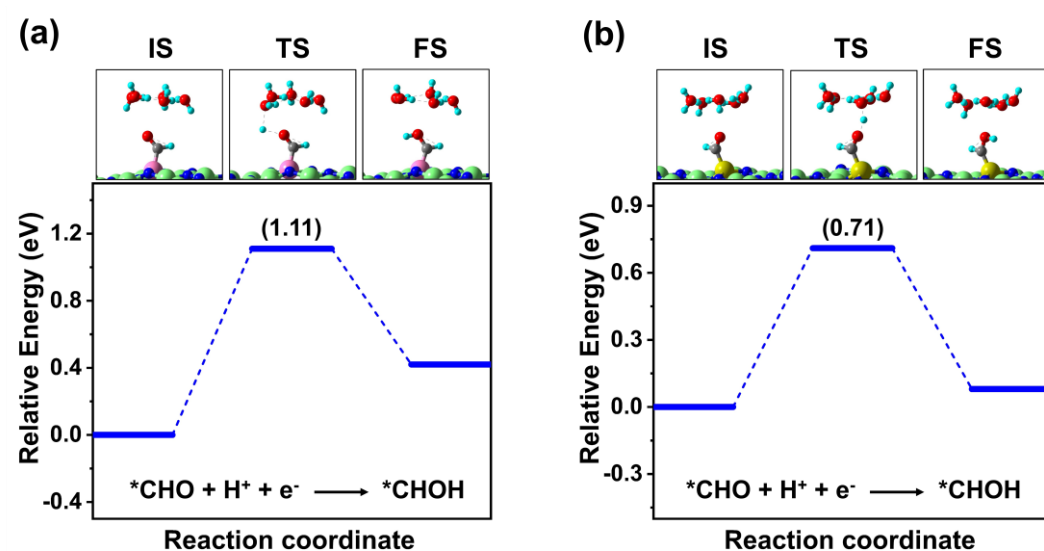

**Fig. S12.** Calculated kinetic energy barriers at the potential limiting steps for CO<sub>2</sub> reduction to CH<sub>4</sub> following the pathway R6 over (a) Os- and (b) Ir-SACs. The (IS) initial state, (TS) transition state and (FS) final state are shown on top of the figure.

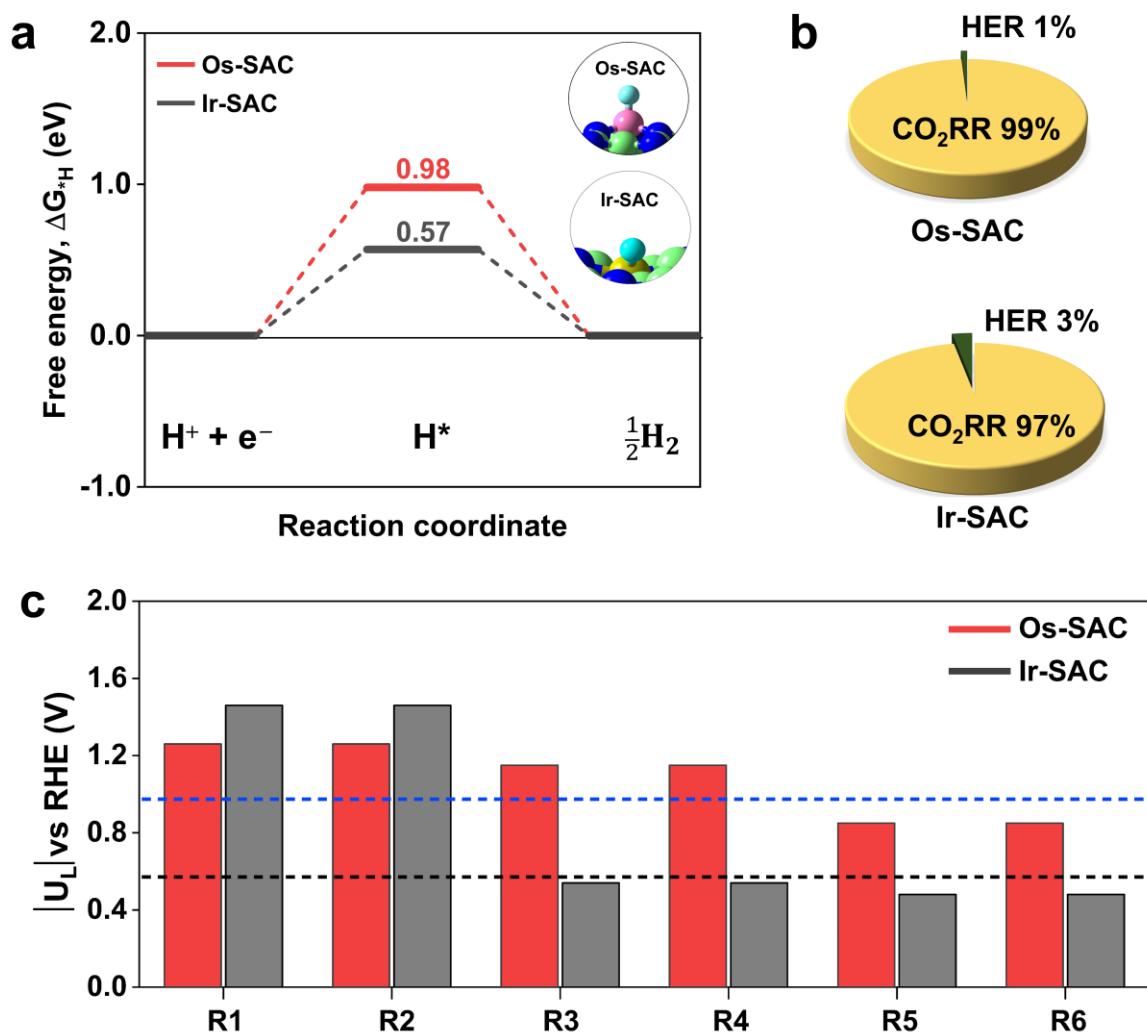

**Fig. S13.** (a) Free energy diagram of HER. The inset shows the H-adsorbed optimized geometries of Os-SAC and Ir-SAC (b) Faradaic efficiencies of the catalysts for CO<sub>2</sub>RR with respect to its competitive HER and (c)  $U_L$ (s) of all the pathways considered in this study for CH<sub>4</sub> production, where blue and black dashed lines represent the  $U_L$  of HER for Os-SAC and Ir-SAC, respectively.

## Supplementary Tables

**Table S1.** TM binding energies ( $E_b$ ) for GaN monolayer surface. The  $E_b$  is provided for three different defect types, including Ga single vacancy (Ga-SV), Nitrogen single vacancy (N-SV), and gallium-nitrogen double vacancy (Ga/N-DV) sites.

| Catalysts | $E_b$ (eV) |       |         |
|-----------|------------|-------|---------|
|           | Ga-SV      | N-SV  | Ga/N-DV |
| Sc-SAC    | -13.29     | -6.58 | -10.15  |
| Ti-SAC    | -11.86     | -6.25 | -9.96   |
| V-SAC     | -11.23     | -4.98 | -8.15   |
| Cr-SAC    | -9.26      | -3.67 | -6.25   |
| Mn-SAC    | -7.92      | -3.03 | -5.99   |
| Fe-SAC    | -8.39      | -3.99 | -6.81   |
| Co-SAC    | -8.30      | -4.67 | -6.58   |
| Ni-SAC    | -7.94      | -4.84 | -6.20   |
| Cu-SAC    | -6.16      | -2.74 | -4.97   |
| Zn-SAC    | -4.20      | -1.43 | -4.16   |
| Y-SAC     | -13.54     | -7.50 | -10.62  |
| Zr-SAC    | -13.51     | -7.40 | -11.61  |
| Nb-SAC    | -11.72     | -5.90 | -8.49   |
| Mo-SAC    | -9.99      | -4.33 | -6.29   |
| Ru-SAC    | -9.33      | -5.91 | -6.82   |
| Rh-SAC    | -8.03      | -6.64 | -5.60   |
| Pd-SAC    | -5.75      | -4.65 | -3.95   |
| Ag-SAC    | -3.84      | -1.90 | -3.66   |
| Cd-SAC    | -3.76      | -1.49 | -2.35   |
| Hf-SAC    | -13.84     | -6.86 | -11.64  |
| Ta-SAC    | -13.03     | -6.07 | -10.75  |
| W-SAC     | -12.85     | -5.55 | -9.62   |
| Re-SAC    | -9.45      | -4.58 | -6.54   |
| Os-SAC    | -11.17     | -6.23 | -7.10   |
| Ir-SAC    | -9.79      | -7.36 | -7.61   |
| Pt-SAC    | -7.77      | -6.16 | -6.66   |
| Au-SAC    | -4.70      | -4.12 | -4.64   |



**Table S2.** Thermodynamic stabilities ( $E_{\text{stab}}$ ) of (TM)SAs embedded at Ga single vacancy (Ga-SV), Nitrogen single vacancy (N-SV), and gallium-nitrogen double vacancy (Ga/N-DV) sites. The more negative  $E_{\text{stab}}$  values indicate the strong metal-support interaction and better stability against metal clustering or being leached.

| Catalysts | $E_{\text{stab}}$ (eV) |       |         |
|-----------|------------------------|-------|---------|
|           | Ga-SV                  | N-SV  | Ga/N-DV |
| Sc-SAC    | -8.65                  | -1.94 | -5.50   |
| Ti-SAC    | -5.86                  | -0.24 | -3.96   |
| V-SAC     | -5.21                  | 1.04  | -2.13   |
| Cr-SAC    | -2.89                  | 2.00  | -1.43   |
| Mn-SAC    | -2.16                  | 2.23  | -1.54   |
| Fe-SAC    | -3.26                  | 1.14  | -1.68   |
| Co-SAC    | -2.92                  | 0.71  | -1.20   |
| Ni-SAC    | -2.77                  | 0.33  | -1.03   |
| Cu-SAC    | -2.57                  | 0.85  | -1.38   |
| Zn-SAC    | -3.08                  | -0.31 | -3.04   |
| Y-SAC     | -9.01                  | -2.98 | -6.09   |
| Zr-SAC    | -6.65                  | -0.53 | -4.74   |
| Nb-SAC    | -3.95                  | 1.86  | -0.73   |
| Mo-SAC    | -2.96                  | 2.71  | 0.75    |
| Ru-SAC    | -2.31                  | 1.14  | 0.21    |
| Rh-SAC    | -2.23                  | -0.84 | 0.20    |
| Pd-SAC    | -2.38                  | -1.29 | -0.58   |
| Ag-SAC    | -1.41                  | 0.53  | -1.23   |
| Cd-SAC    | -3.06                  | -0.79 | -1.65   |
| Hf-SAC    | -6.88                  | 0.10  | -4.68   |
| Ta-SAC    | -4.43                  | 2.53  | -2.15   |
| W-SAC     | -3.62                  | 3.68  | -0.39   |
| Re-SAC    | -1.40                  | 3.47  | 1.51    |
| Os-SAC    | -2.55                  | 2.39  | 1.52    |
| Ir-SAC    | -2.69                  | -0.26 | -0.51   |
| Pt-SAC    | -2.47                  | -0.87 | -1.36   |
| Au-SAC    | -1.88                  | -1.30 | -1.83   |

**Table S3.** Electrochemical stabilities ( $U_{\text{diss}}$ ) of (TM)SAs embedded at Ga single vacancy (Ga-SV), Nitrogen single vacancy (N-SV), and gallium-nitrogen double vacancy (Ga/N-DV) sites.  $U^{\circ}_{\text{diss}}$  and  $eN$  represents the standard dissolution potential of bulk TMs and the number of transferred electrons during the dissolution process, respectively.

| Catalysts | $U^{\circ}_{\text{diss}}$ (V) | $N_e$ | $U_{\text{diss}}$ (V) |       |         |
|-----------|-------------------------------|-------|-----------------------|-------|---------|
|           |                               |       | Ga-SV                 | N-SV  | Ga/N-DV |
| Sc-SAC    | -2.08                         | 3     | 0.80                  | -1.43 | -0.25   |
| Ti-SAC    | -1.63                         | 2     | 1.30                  | -1.51 | 0.35    |
| V-SAC     | -1.18                         | 2     | 1.43                  | -1.70 | -0.11   |
| Cr-SAC    | -0.91                         | 2     | 0.54                  | -1.91 | -0.19   |
| Mn-SAC    | -1.19                         | 2     | -0.11                 | -2.31 | -0.42   |
| Fe-SAC    | -0.45                         | 2     | 1.18                  | -1.02 | 0.39    |
| Co-SAC    | -0.28                         | 2     | 1.18                  | -0.64 | 0.32    |
| Ni-SAC    | -0.26                         | 2     | 1.12                  | -0.43 | 0.25    |
| Cu-SAC    | 0.34                          | 2     | 1.62                  | -0.09 | 1.03    |
| Zn-SAC    | -0.76                         | 2     | 0.78                  | -0.61 | 0.76    |
| Y-SAC     | -2.37                         | 3     | 0.63                  | -1.38 | -0.34   |
| Zr-SAC    | -1.45                         | 4     | 0.21                  | -1.32 | -0.26   |
| Nb-SAC    | -1.10                         | 3     | 0.22                  | -1.72 | -0.86   |
| Mo-SAC    | -0.20                         | 3     | 0.79                  | -1.10 | -0.45   |
| Ru-SAC    | 0.46                          | 2     | 1.62                  | -0.10 | 0.36    |
| Rh-SAC    | 0.60                          | 2     | 1.71                  | 1.02  | 0.50    |
| Pd-SAC    | 0.95                          | 2     | 2.14                  | 1.59  | 1.24    |
| Ag-SAC    | 0.80                          | 1     | 2.21                  | 0.27  | 2.03    |
| Cd-SAC    | -0.40                         | 2     | 1.13                  | -0.01 | 0.42    |
| Hf-SAC    | -1.55                         | 4     | 0.17                  | -1.58 | -0.38   |
| Ta-SAC    | -0.60                         | 3     | 0.88                  | -1.44 | 0.12    |
| W-SAC     | 0.10                          | 3     | 1.31                  | -1.13 | 0.23    |
| Re-SAC    | 0.30                          | 3     | 0.77                  | -0.86 | -0.20   |
| Os-SAC    | 0.84                          | 8     | 1.16                  | 0.54  | 0.65    |
| Ir-SAC    | 1.16                          | 3     | 2.06                  | 1.25  | 1.33    |
| Pt-SAC    | 1.18                          | 2     | 2.42                  | 1.61  | 1.86    |
| Au-SAC    | 1.50                          | 3     | 2.13                  | 1.93  | 2.11    |

**Table S4.** Geometrical parameters of CO<sub>2</sub> molecule after adsorption over various single atom catalysts (SACs). Adsorption energy of CO<sub>2</sub> ( $E_{\text{ads}}[*\text{CO}_2]$ ), angle between O=C=O ( $\varphi_{\text{OCO}}$ ), distance from transition metal to carbon atom of adsorbed CO<sub>2</sub> ( $d^{\text{TM-C}}$ ), distance between oxygen and carbon atoms ( $d^{\text{O-C}}$ ), and the corresponding configurations of CO<sub>2</sub><sup>•-</sup> species.

| Catalysts | $E_{\text{ads}}[*\text{CO}_2]$<br>(eV) | $\varphi_{\text{OCO}}$<br>(deg.) | $d^{\text{TM-C}}$<br>(Å) | $d^{\text{O-C}}$ (Å) |      | CO <sub>2</sub> <sup>•-</sup><br>Configuration |
|-----------|----------------------------------------|----------------------------------|--------------------------|----------------------|------|------------------------------------------------|
|           |                                        |                                  |                          | 1O-C                 | 2O-C |                                                |
| Sc-SAC    | -0.28                                  | 179.8                            | 4.55                     | 1.18                 | 1.18 | -                                              |
| Ti-SAC    | -1.64                                  | 135.8                            | 2.50                     | 1.28                 | 1.22 | C <sub>s</sub>                                 |
| V-SAC     | -1.39                                  | 130.5                            | 2.03                     | 1.31                 | 1.24 | C <sub>s</sub>                                 |
| Cr-SAC    | -0.41                                  | 133.6                            | 1.97                     | 1.30                 | 1.23 | C <sub>s</sub>                                 |
| Mn-SAC    | -1.10                                  | 133.8                            | 2.07                     | 1.26                 | 1.25 | C <sub>2v</sub>                                |
| Fe-SAC    | -1.08                                  | 179.7                            | 4.00                     | 1.18                 | 1.18 | -                                              |
| Co-SAC    | -0.97                                  | 179.5                            | 3.55                     | 1.18                 | 1.18 | -                                              |
| Ni-SAC    | -0.24                                  | 179.7                            | 3.50                     | 1.18                 | 1.18 | -                                              |
| Cu-SAC    | -0.25                                  | 179.7                            | 3.70                     | 1.18                 | 1.18 | -                                              |
| Zn-SAC    | -1.22                                  | 179.6                            | 3.82                     | 1.18                 | 1.18 | -                                              |
| Y-SAC     | -0.27                                  | 179.8                            | 4.78                     | 1.18                 | 1.18 | -                                              |
| Zr-SAC    | -1.41                                  | 135.2                            | 2.43                     | 1.26                 | 1.23 | C <sub>2v</sub>                                |
| Nb-SAC    | -2.92                                  | 126.7                            | 2.17                     | 1.33                 | 1.24 | C <sub>s</sub>                                 |
| Mo-SAC    | -1.82                                  | 129.7                            | 2.08                     | 1.33                 | 1.25 | C <sub>s</sub>                                 |
| Ru-SAC    | -1.13                                  | 125.1                            | 2.04                     | 1.32                 | 1.25 | C <sub>2v</sub>                                |
| Rh-SAC    | -0.62                                  | 129.5                            | 2.04                     | 1.29                 | 1.24 | C <sub>2v</sub>                                |
| Pd-SAC    | -0.29                                  | 179.8                            | 3.89                     | 1.18                 | 1.18 | -                                              |
| Ag-SAC    | -0.21                                  | 178.3                            | 3.89                     | 1.18                 | 1.18 | -                                              |
| Cd-SAC    | -0.33                                  | 179.6                            | 4.61                     | 1.18                 | 1.18 | -                                              |
| Hf-SAC    | -1.44                                  | 133.9                            | 2.32                     | 1.27                 | 1.23 | C <sub>2v</sub>                                |
| Ta-SAC    | -3.02                                  | 125.6                            | 2.17                     | 1.34                 | 1.24 | C <sub>s</sub>                                 |
| W-SAC     | -1.36                                  | 127.7                            | 2.07                     | 1.34                 | 1.25 | C <sub>s</sub>                                 |
| Re-SAC    | -2.74                                  | 125.6                            | 2.10                     | 1.34                 | 1.25 | C <sub>2v</sub>                                |
| Os-SAC    | -0.61                                  | 131.2                            | 2.09                     | 1.27                 | 1.25 | C <sub>2v</sub>                                |
| Ir-SAC    | -0.30                                  | 134.4                            | 2.03                     | 1.26                 | 1.24 | C <sub>2v</sub>                                |
| Pt-SAC    | 0.36                                   | 139.7                            | 2.13                     | 1.24                 | 1.23 | C <sub>2v</sub>                                |
| Au-SAC    | 0.02                                   | 178.9                            | 3.79                     | 1.18                 | 1.18 | -                                              |

**Table S5.** Bader charge analysis of CO<sub>2</sub> adsorbed systems. TM denotes the transition metal, and the CO<sub>2</sub> adsorbate atoms are represented by C, 1O and 2O. The net charge transfer from surface to adsorbed CO<sub>2</sub> is also provided.

| Catalysts | TM    | C     | 1O     | 2O     | Net charge on CO <sub>2</sub> |
|-----------|-------|-------|--------|--------|-------------------------------|
| Sc-SAC    | 2.089 | 2.164 | -1.092 | -1.095 | -0.023                        |
| Ti-SAC    | 1.991 | 1.507 | -1.147 | -1.149 | -0.789                        |
| V-SAC     | 1.873 | 1.275 | -1.129 | -1.224 | -1.078                        |
| Cr-SAC    | 1.647 | 1.380 | -1.107 | -1.204 | -0.930                        |
| Mn-SAC    | 1.437 | 1.491 | -1.202 | -1.199 | -0.911                        |
| Fe-SAC    | 1.341 | 2.156 | -1.091 | -1.084 | -0.019                        |
| Co-SAC    | 1.039 | 2.142 | -1.086 | -1.090 | -0.034                        |
| Ni-SAC    | 0.944 | 2.151 | -1.083 | -1.099 | -0.031                        |
| Cu-SAC    | 0.884 | 2.149 | -1.086 | -1.094 | -0.030                        |
| Zn-SAC    | 1.063 | 2.151 | -1.084 | -1.090 | -0.024                        |
| Y-SAC     | 2.312 | 2.164 | -1.097 | -1.092 | -0.025                        |
| Zr-SAC    | 2.630 | 1.524 | -1.154 | -1.168 | -0.794                        |
| Nb-SAC    | 2.266 | 1.180 | -1.178 | -1.249 | -1.247                        |
| Mo-SAC    | 1.961 | 1.242 | -1.113 | -1.236 | -1.107                        |
| Ru-SAC    | 1.255 | 1.411 | -1.202 | -1.162 | -0.953                        |
| Rh-SAC    | 0.075 | 1.510 | -1.154 | -1.184 | -0.828                        |
| Pd-SAC    | 1.555 | 2.167 | -1.073 | -1.071 | 0.023                         |
| Ag-SAC    | 0.751 | 2.153 | -1.042 | -1.047 | 0.064                         |
| Cd-SAC    | 1.017 | 2.196 | -1.108 | -1.102 | -0.015                        |
| Hf-SAC    | 2.545 | 1.531 | -1.199 | -1.149 | -0.817                        |
| Ta-SAC    | 2.410 | 1.116 | -1.162 | -1.257 | -1.304                        |
| W-SAC     | 2.180 | 1.132 | -1.106 | -1.245 | -1.218                        |
| Re-SAC    | 1.713 | 1.282 | -1.220 | -1.167 | -1.105                        |
| Os-SAC    | 2.778 | 1.371 | -1.230 | -1.211 | -1.070                        |
| Ir-SAC    | 1.058 | 1.543 | -1.140 | -1.201 | -0.798                        |
| Pt-SAC    | 0.742 | 1.721 | -1.139 | -1.164 | -0.583                        |
| Au-SAC    | 1.515 | 2.174 | -1.10  | -1.103 | -0.029                        |

**Table S6.** DFT calculated electronic energies, zero-point energies, and entropy contributions for the gaseous molecules at T = 298 K.

| Species            | $E_{elec}$ (eV) | ZPE (eV) | -TS (eV) |
|--------------------|-----------------|----------|----------|
| CO <sub>2</sub>    | -22.24          | 0.31     | -0.64    |
| CO                 | -14.42          | 0.14     | -0.61    |
| HCOOH              | -29.22          | 0.90     | -1.03    |
| CH <sub>3</sub> OH | -29.93          | 1.35     | -0.78    |
| CH <sub>4</sub>    | -24.04          | 1.19     | -0.60    |
| H <sub>2</sub> O   | -14.15          | 0.57     | -0.64    |
| 0.5×H <sub>2</sub> | -3.495          | 0.14     | -0.20    |

**Table S7.** Zero-point energies and entropy contributions to the adsorbate free energy at T = 298 K.

| Adsorbate           | ZPE (eV) | -TS (eV) |
|---------------------|----------|----------|
| *COOH               | 0.56     | -0.17    |
| *OCHO               | 0.56     | -0.14    |
| *CO                 | 0.20     | -0.15    |
| *HCOOH              | 0.91     | -0.19    |
| *CHO                | 0.46     | -0.15    |
| *CHOH               | 0.81     | -0.11    |
| *CH <sub>2</sub> OH | 1.10     | -0.16    |
| *CH <sub>3</sub> O  | 1.08     | -0.16    |
| *O                  | 0.20     | -0.16    |
| *OH                 | 0.35     | -0.09    |
| *C                  | 0.09     | -0.04    |
| *CH                 | 0.32     | -0.09    |
| *CH <sub>2</sub>    | 0.61     | -0.10    |
| *CH <sub>3</sub>    | 0.95     | -0.12    |

**Table S8.** Several CO<sub>2</sub>RR products with reaction mechanisms and corresponding equilibrium potentials.

| Cathode Reaction                                  | Product         | $U_{eq}$ vs RHE (V) |
|---------------------------------------------------|-----------------|---------------------|
| $CO_2 + 2H^+ + 2e^- \rightarrow CO(g) + H_2O$     | Carbon monoxide | -0.11               |
| $CO_2 + 2H^+ + 2e^- \rightarrow HCOOH(l) + H_2O$  | Formic acid     | -0.25               |
| $CO_2 + 6H^+ + 6e^- \rightarrow CH_3OH(l) + H_2O$ | Methanol        | 0.02                |
| $CO_2 + 8H^+ + 8e^- \rightarrow CH_4(g) + 2H_2O$  | Methane         | 0.17                |

**Table S9.** Adsorption Gibb's free energies ( $\Delta G$ ) of first protonation step (\*COOH or \*OCHO) for chemisorbed systems.

| Catalysts | $\Delta G^{*COOH}$ | $\Delta G^{*OCHO}$ |
|-----------|--------------------|--------------------|
| Ti-SAC    | -0.10              | -1.44              |
| V-SAC     | 0.49               | -0.61              |
| Cr-SAC    | -0.02              | -0.74              |
| Mn-SAC    | 0.29               | -0.10              |
| Zr-SAC    | 0.51               | -1.14              |
| Nb-SAC    | 1.03               | 0.07               |
| Mo-SAC    | 0.89               | 0.18               |
| Ru-SAC    | 0.66               | 0.64               |
| Rh-SAC    | 0.46               | 0.40               |
| Hf-SAC    | 0.42               | -1.19              |
| Ta-SAC    | 1.10               | 0.15               |
| W-SAC     | 0.44               | -0.02              |
| Re-SAC    | 0.66               | 0.60               |
| Os-SAC    | 0.63               | 1.27               |
| Ir-SAC    | 0.45               | 0.62               |

**Table S10.** Adsorption Gibbs free energies of elementary reaction steps of CO<sub>2</sub>RR over Os and Ir-SAC.

| Elementary reaction step                       | $\Delta G$ (eV) |        |
|------------------------------------------------|-----------------|--------|
|                                                | Os-SAC          | Ir-SAC |
| $*CO_2^{\bullet-} + H^+ \rightarrow *COOH$     | 0.63            | 0.45   |
| $*CO_2^{\bullet-} + H^+ \rightarrow *OCHO$     | 1.27            | 0.62   |
| $*COOH + H^+ + e^- \rightarrow *CO + H_2O$     | -0.34           | -0.29  |
| $*CO + H^+ + e^- \rightarrow *COH$             | 1.26            | 1.46   |
| $*CO + H^+ + e^- \rightarrow *CHO$             | 0.31            | 0.19   |
| $*COH + H^+ + e^- \rightarrow *C + H_2O$       | 0.19            | 0.07   |
| $*COH + H^+ + e^- \rightarrow *CHOH$           | -0.11           | -0.80  |
| $*C + H^+ + e^- \rightarrow *CH$               | -0.32           | -0.44  |
| $*CHOH + H^+ + e^- \rightarrow *CH + H_2O$     | -0.02           | 0.42   |
| $*CHO + H^+ + e^- \rightarrow *OCH_2$          | 1.15            | 0.54   |
| $*CHO + H^+ + e^- \rightarrow *CHOH$           | 0.85            | 0.48   |
| $*OCH_2 + H^+ + e^- \rightarrow *CH_2OH$       | -0.41           | -0.05  |
| $*OCH_2 + H^+ + e^- \rightarrow *OCH_3$        | -0.64           | 0.14   |
| $*OCH_3 + H^+ + e^- \rightarrow *CH_3OH$       | 0.19            | -0.69  |
| $*OCH_3 + H^+ + e^- \rightarrow *O + CH_4$     | -1.82           | -1.80  |
| $*CH_2OH + H^+ + e^- \rightarrow *CH_2 + H_2O$ | -0.52           | -0.63  |
| $*CH_2OH + H^+ + e^- \rightarrow *CH_3OH$      | -0.14           | -0.61  |
| $*CH + H^+ + e^- \rightarrow *CH_2$            | -0.62           | -1.05  |
| $*CH_2 + H^+ + e^- \rightarrow *CH_3$          | -0.41           | -0.21  |
| $*CH_3 + H^+ + e^- \rightarrow *CH_4$          | -0.55           | -0.60  |
| $*CH_3OH \rightarrow CH_3OH + *$               | -0.90           | -0.24  |
| $*CH_4 \rightarrow CH_4 + *$                   | -0.81           | -0.65  |

**Table S11.** Potential limiting step (PLS), final product, CO<sub>2</sub>RR limiting potential ( $U_{L(\text{CO}_2\text{RR})}$ ) and corresponding overpotential ( $\eta$ ) values are provided for considered TM-SACs.

| Catalysts     | PLS                                              | Product         | $U_{L(\text{CO}_2\text{RR})}$ (V) | $\eta$ (V) |
|---------------|--------------------------------------------------|-----------------|-----------------------------------|------------|
| <b>Ti-SAC</b> | *OCHO + H <sup>+</sup> + e <sup>-</sup> → *HCOOH | HCOOH           | -1.72                             | 1.47       |
| <b>V-SAC</b>  | *OCHO + H <sup>+</sup> + e <sup>-</sup> → *HCOOH | HCOOH           | -1.80                             | 1.55       |
| <b>Cr-SAC</b> | *OCHO + H <sup>+</sup> + e <sup>-</sup> → *HCOOH | HCOOH           | -1.42                             | 1.17       |
| <b>Mn-SAC</b> | *OCHO + H <sup>+</sup> + e <sup>-</sup> → *HCOOH | HCOOH           | -0.50                             | 0.25       |
| <b>Zr-SAC</b> | *OCHO + H <sup>+</sup> + e <sup>-</sup> → *HCOOH | HCOOH           | -1.56                             | 1.31       |
| <b>Nb-SAC</b> | *OCHO + H <sup>+</sup> + e <sup>-</sup> → *HCOOH | HCOOH           | -1.61                             | 1.36       |
| <b>Mo-SAC</b> | *OCHO + H <sup>+</sup> + e <sup>-</sup> → *HCOOH | HCOOH           | -1.62                             | 1.37       |
| <b>Ru-SAC</b> | *OCHO + H <sup>+</sup> + e <sup>-</sup> → *HCOOH | HCOOH           | -1.08                             | 0.83       |
| <b>Rh-SAC</b> | *OCHO + H <sup>+</sup> + e <sup>-</sup> → *HCOOH | HCOOH           | -0.42                             | 0.17       |
| <b>Hf-SAC</b> | *OCHO + H <sup>+</sup> + e <sup>-</sup> → *HCOOH | HCOOH           | -1.68                             | 1.43       |
| <b>Ta-SAC</b> | *OCHO + H <sup>+</sup> + e <sup>-</sup> → *HCOOH | HCOOH           | -1.62                             | 1.37       |
| <b>W-SAC</b>  | *OCHO + H <sup>+</sup> + e <sup>-</sup> → *HCOOH | HCOOH           | -2.17                             | 1.92       |
| <b>Re-SAC</b> | *OCHO + H <sup>+</sup> + e <sup>-</sup> → *HCOOH | HCOOH           | -2.05                             | 1.80       |
| <b>Os-SAC</b> | *CHO + H <sup>+</sup> + e <sup>-</sup> → *CHOH   | CH <sub>4</sub> | -0.85                             | 1.02       |
| <b>Ir-SAC</b> | *CHO + H <sup>+</sup> + e <sup>-</sup> → *CHOH   | CH <sub>4</sub> | -0.48                             | 0.65       |
